# Supplementary material for: Tumor-dependent increase of serum amino acid levels in breast cancer patients has diagnostic potential and correlates with molecular tumor subtypes
Source: PubMed Central journal article supplement (PMC3835137; doi:10.1186/1479-5876-11-290), 2013-11-16

# Supplemental Figure 1

## Aa

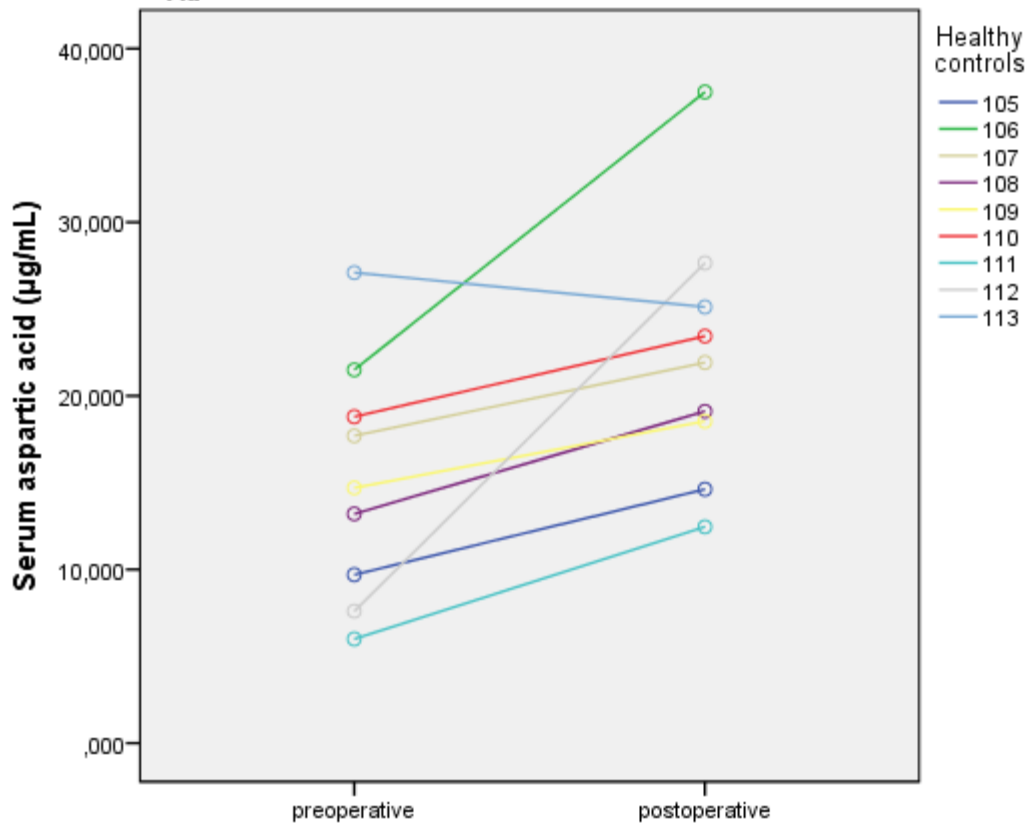

## Ab

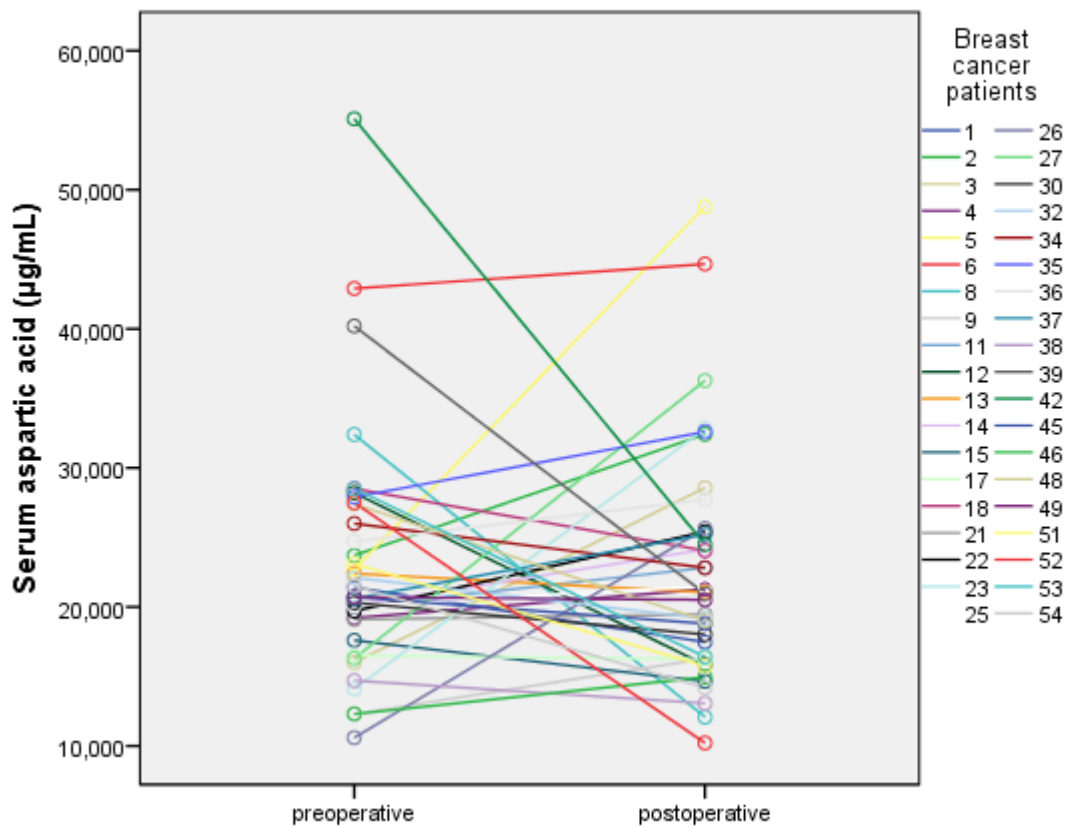

**Ba**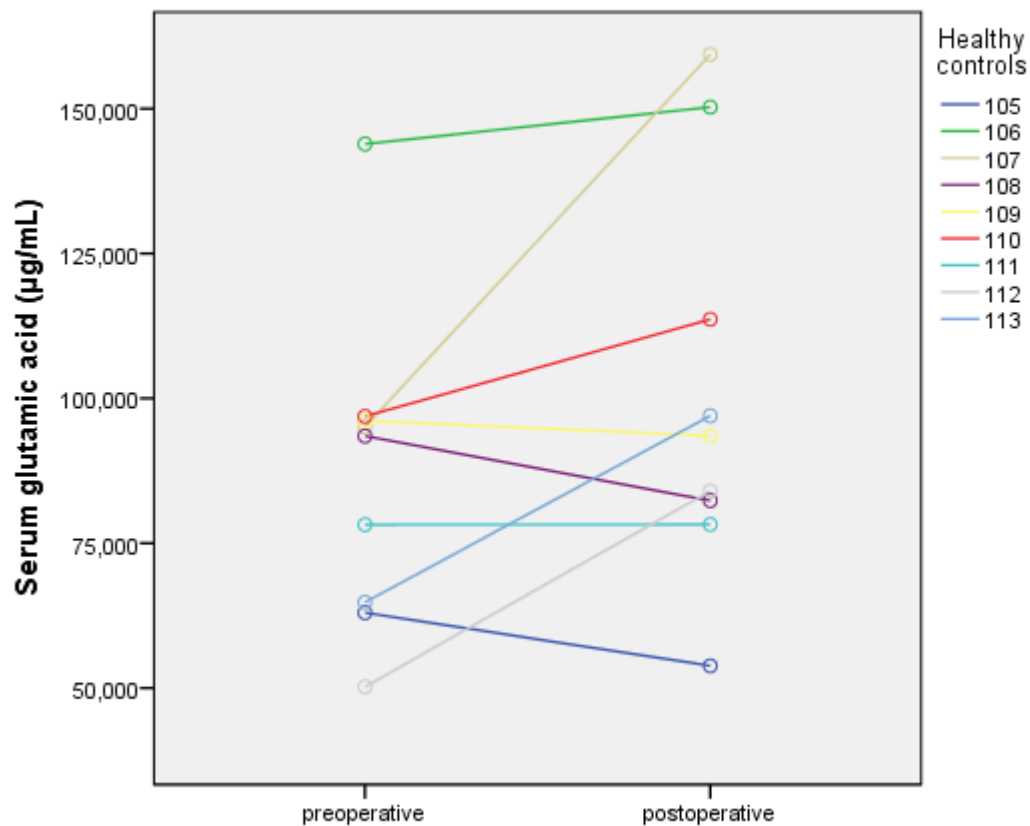**Bb**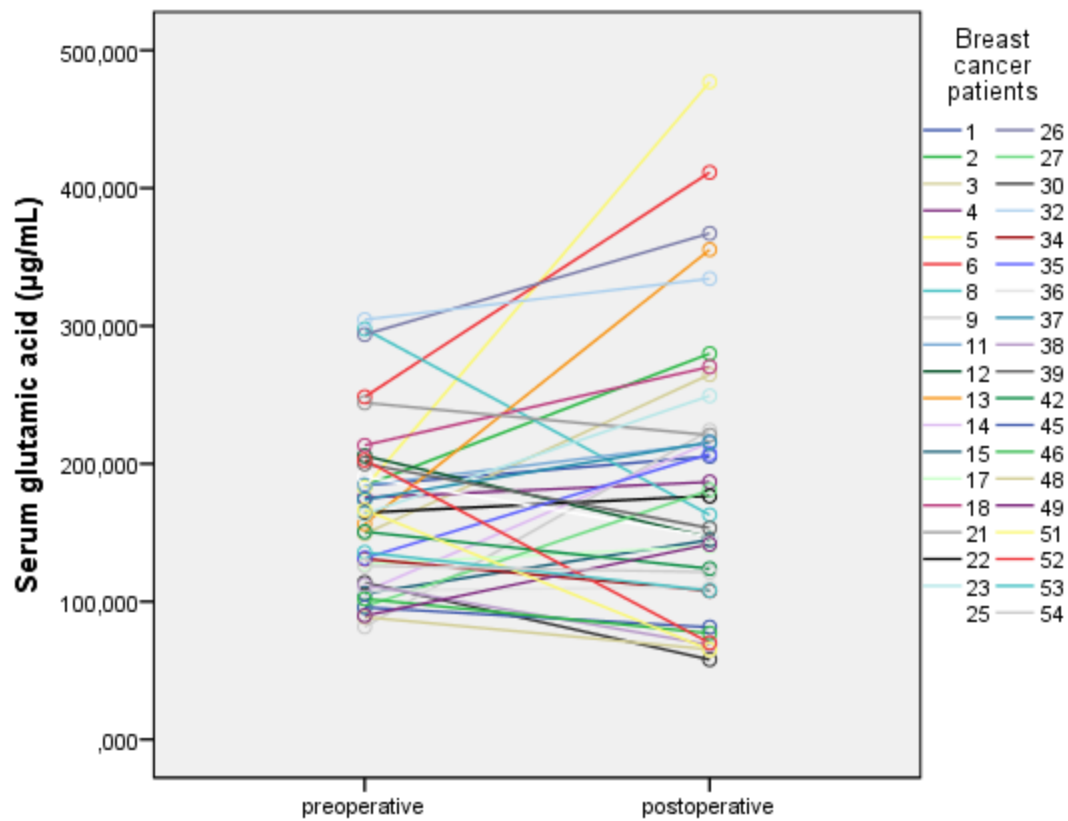

**Ca**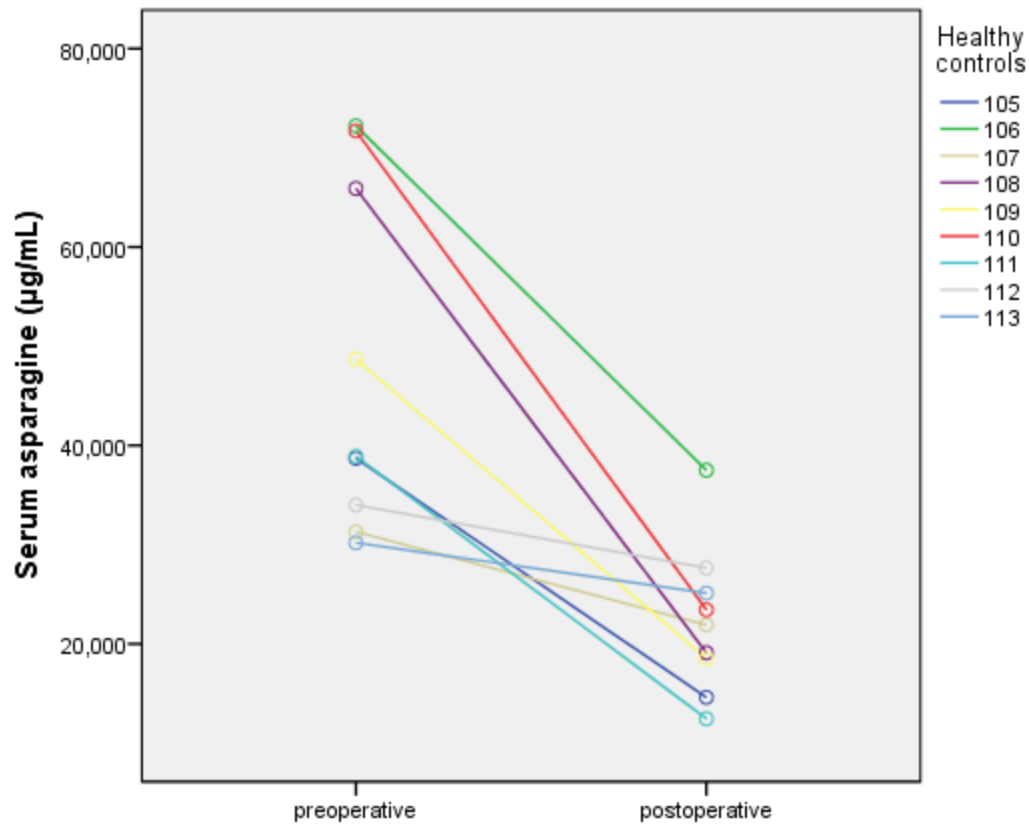**Cb**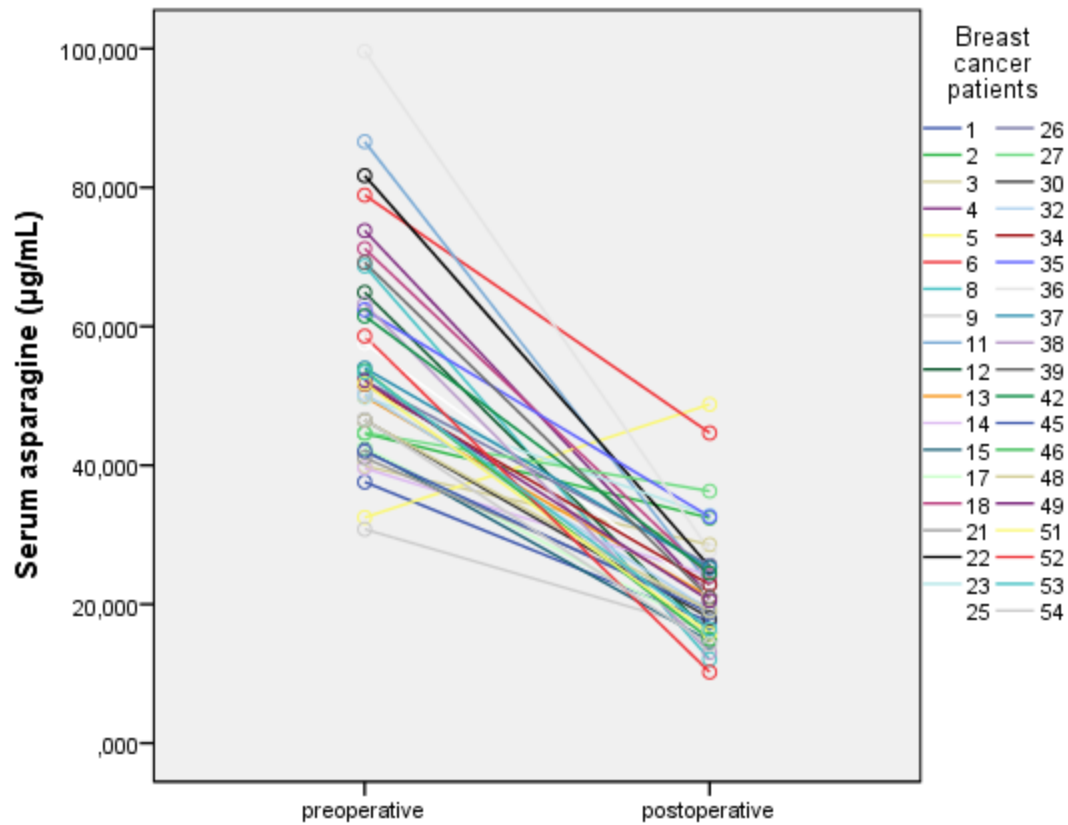

Da

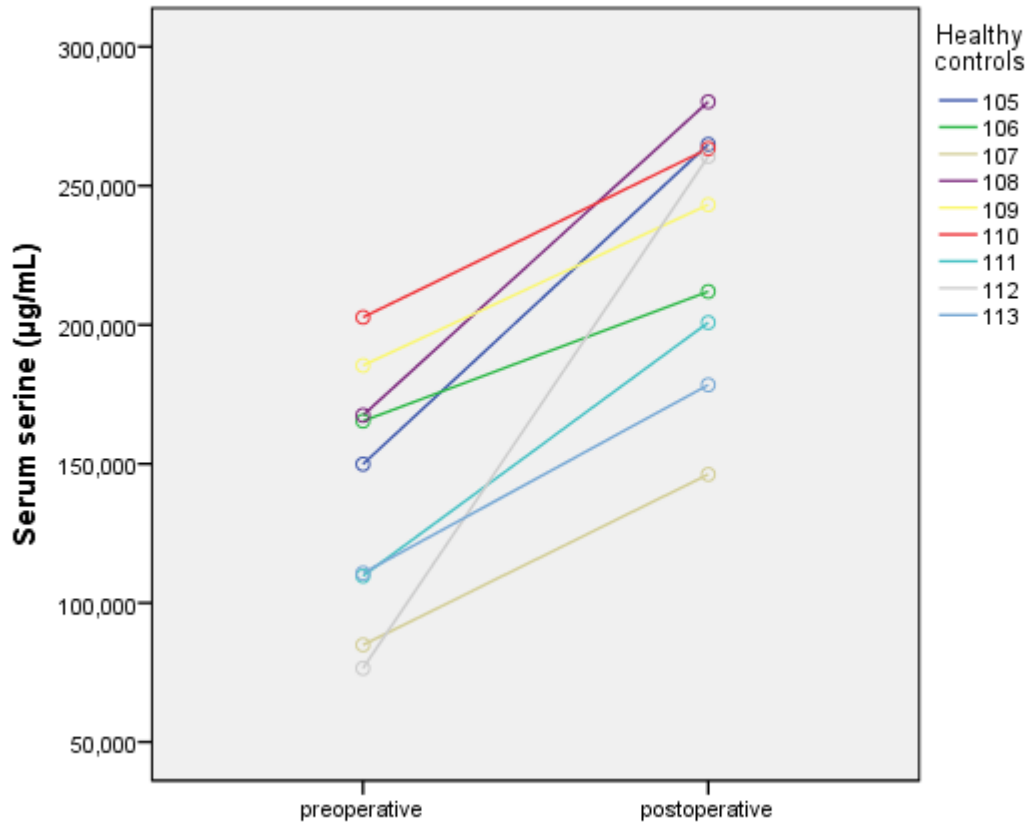

Db

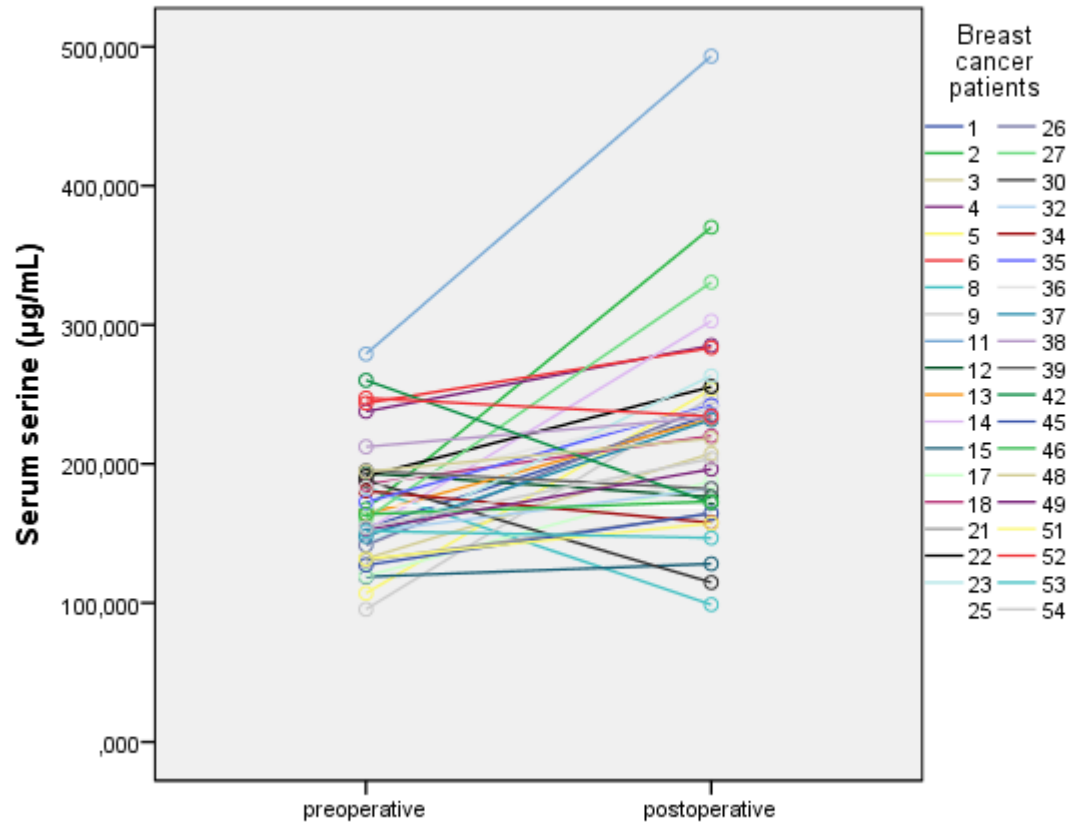

**Ea**

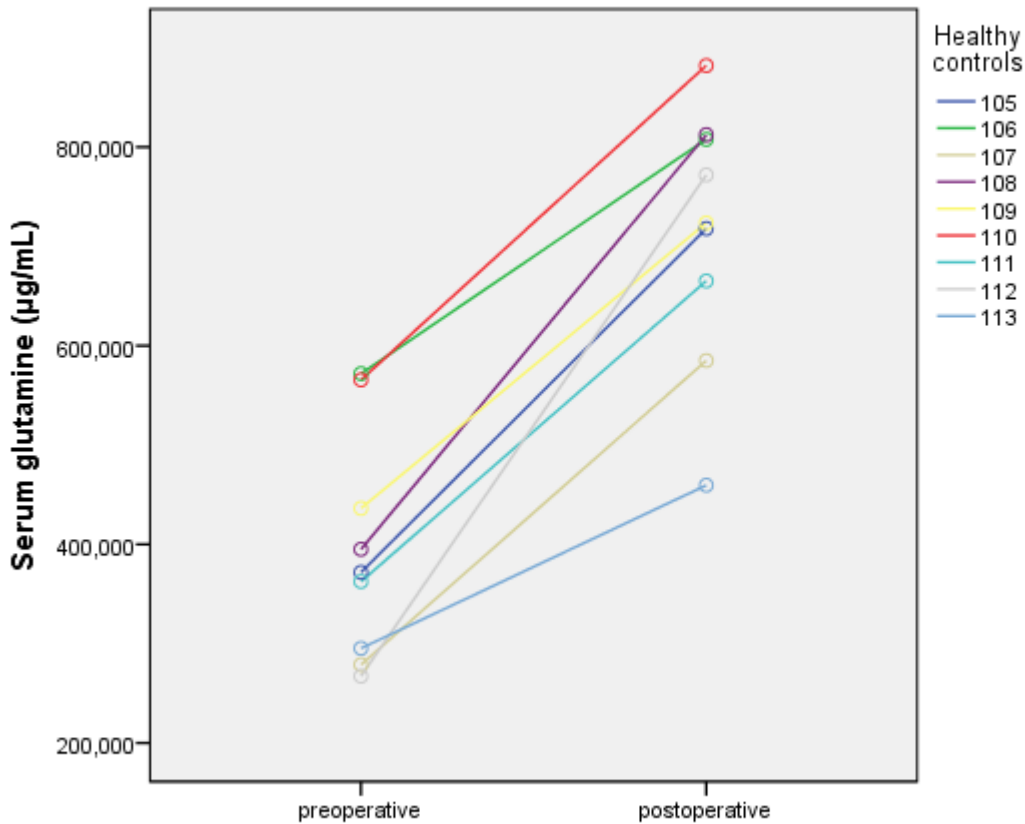

**Eb**

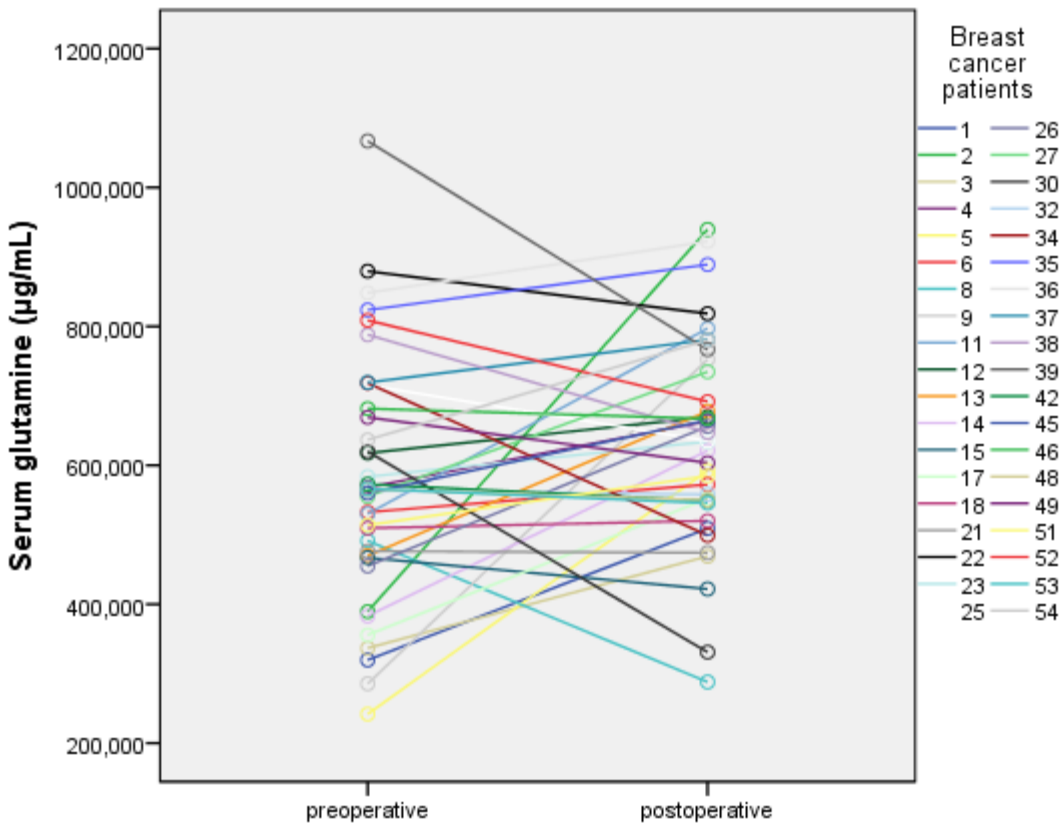

**Fa**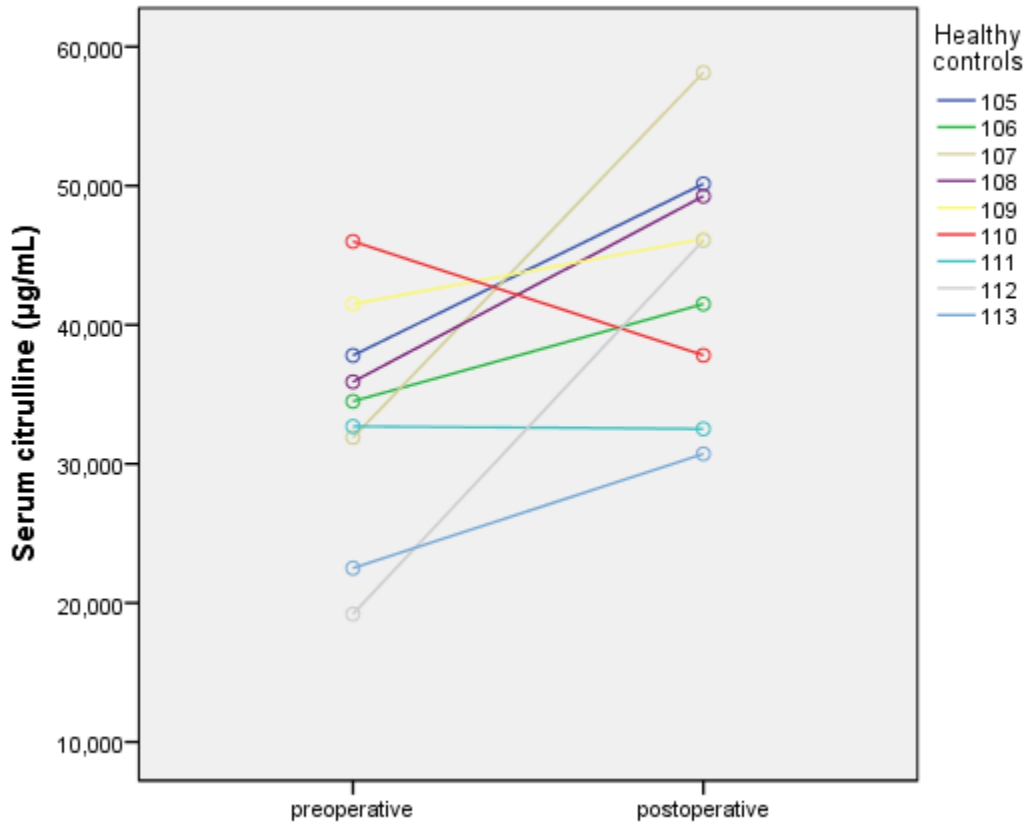**Fb**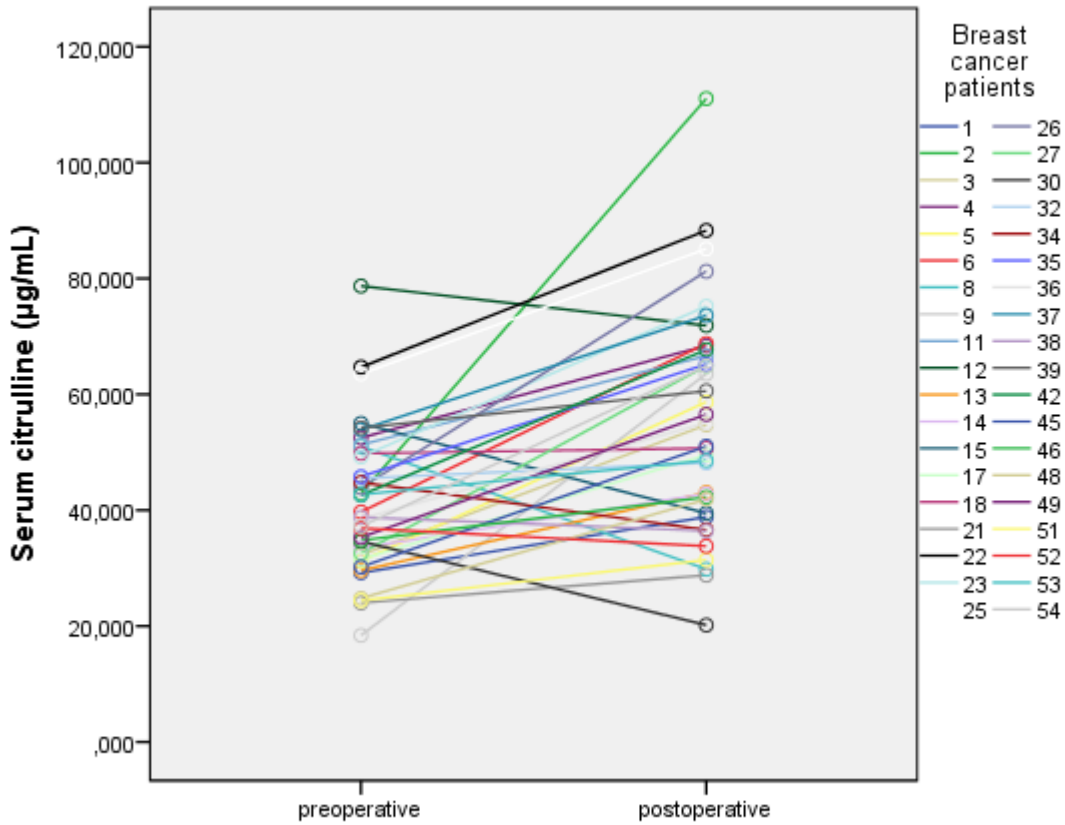

**Ga**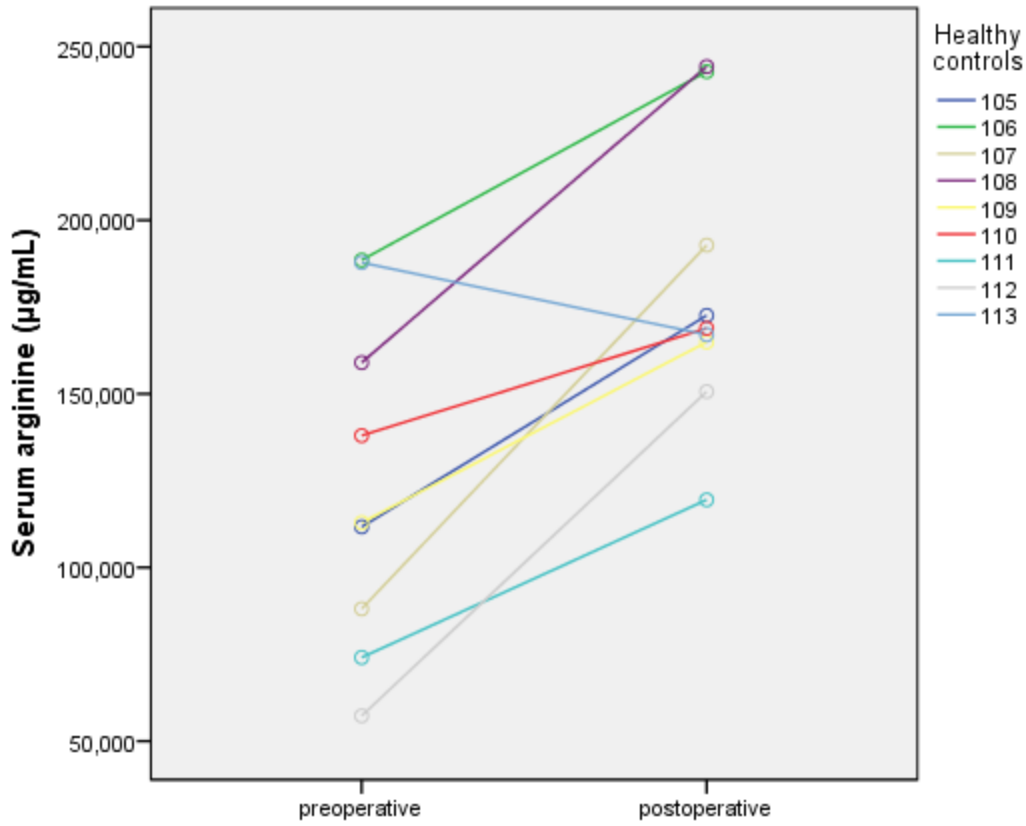**Gb**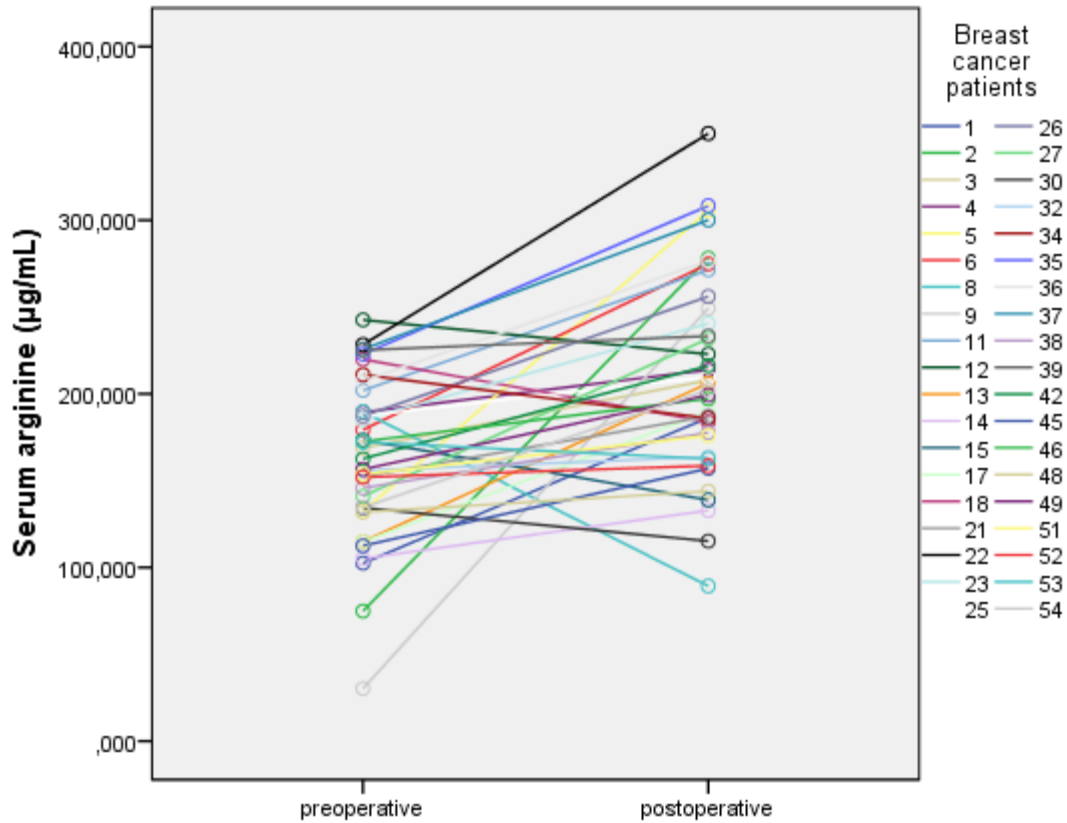

**Ha**

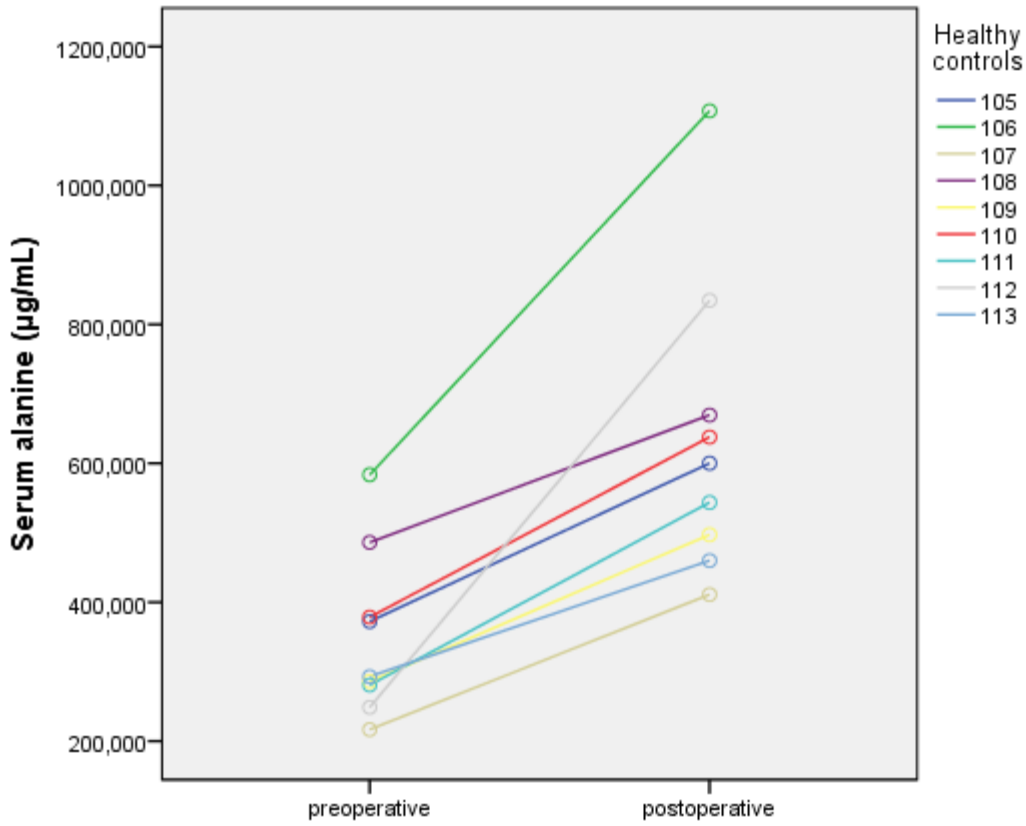

**Hb**

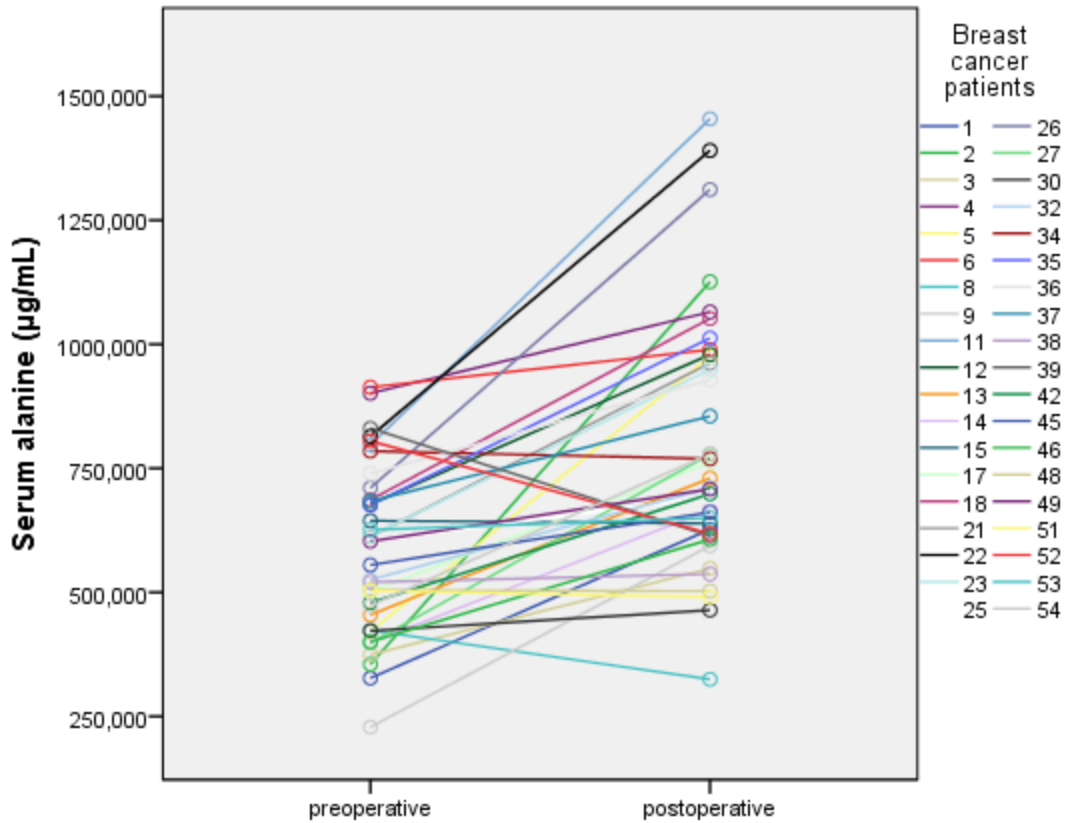



**la**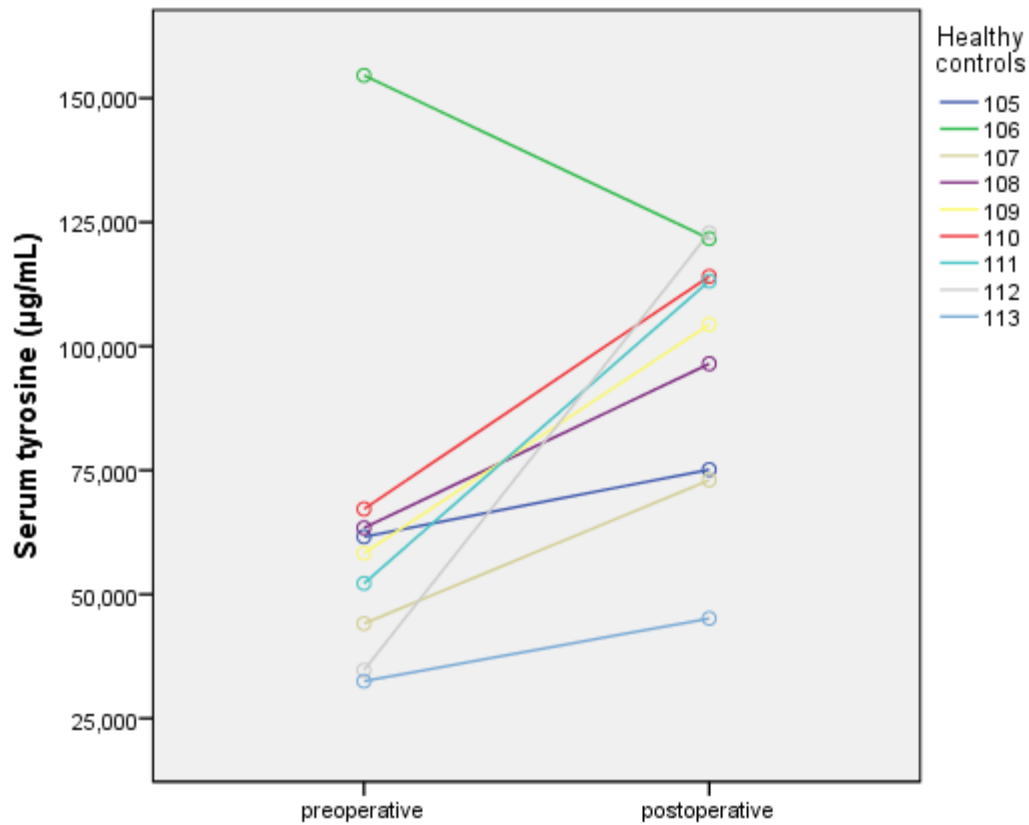**lb**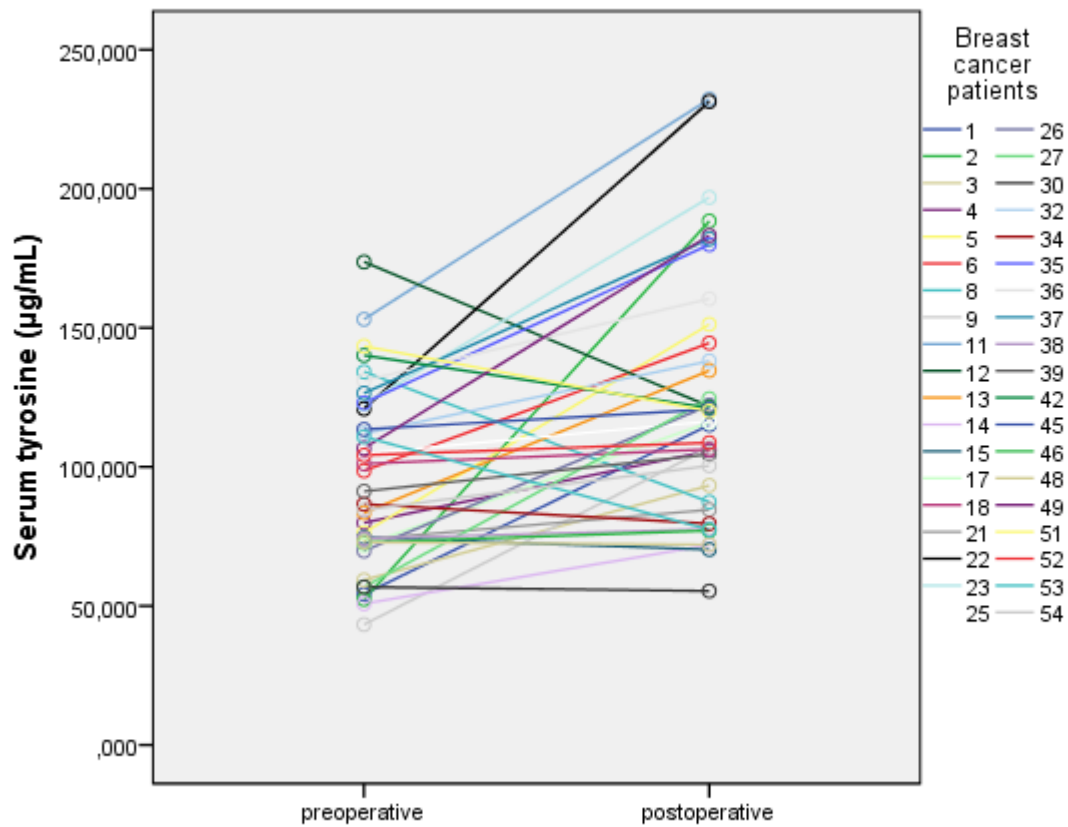

**Ja**

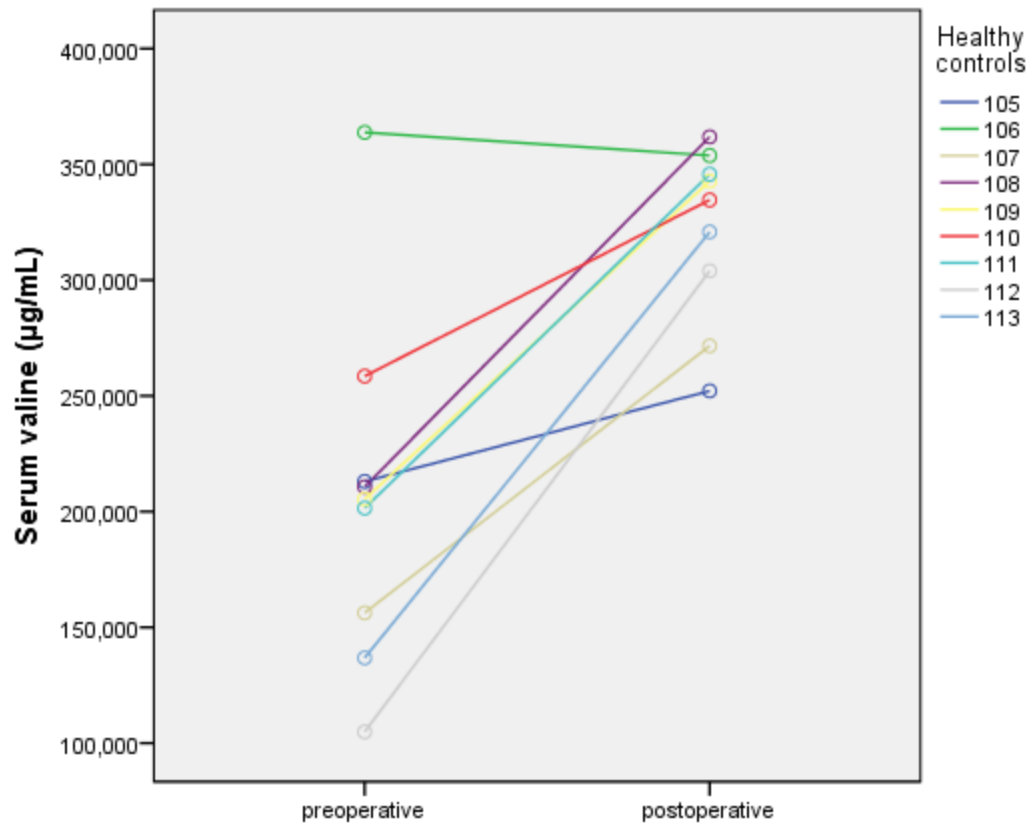

**Jb**

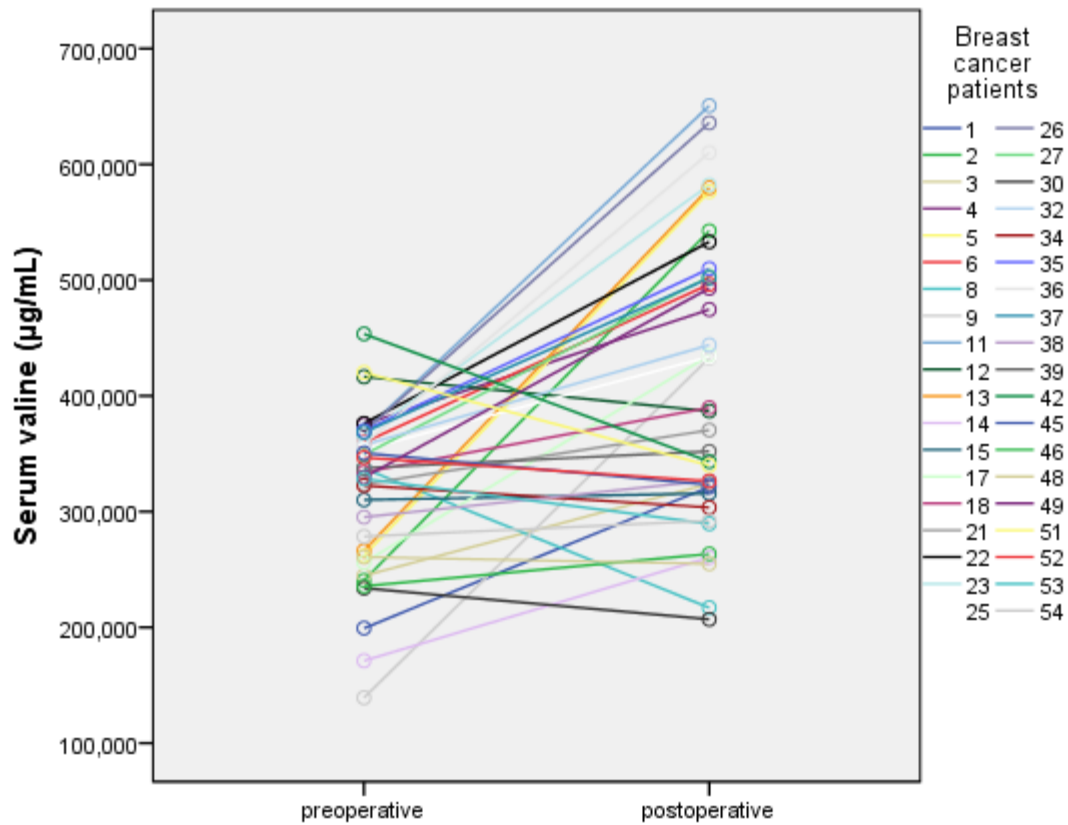

**Ka**

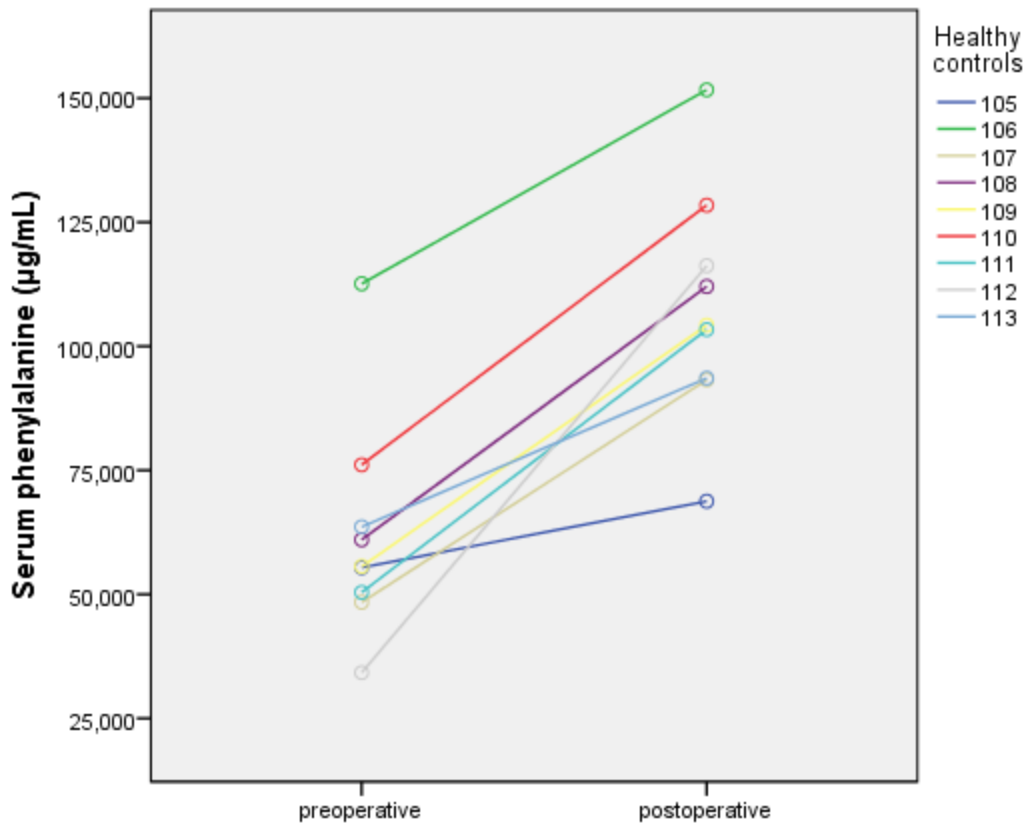

**Kb**

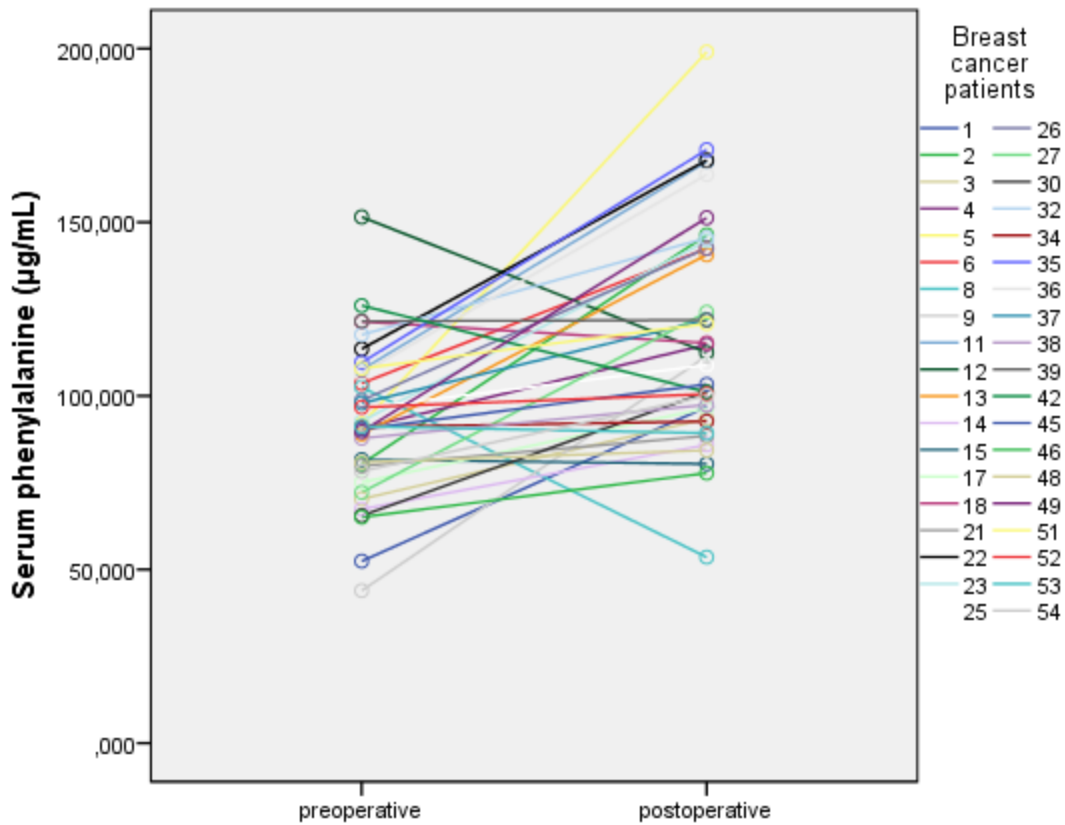

**La**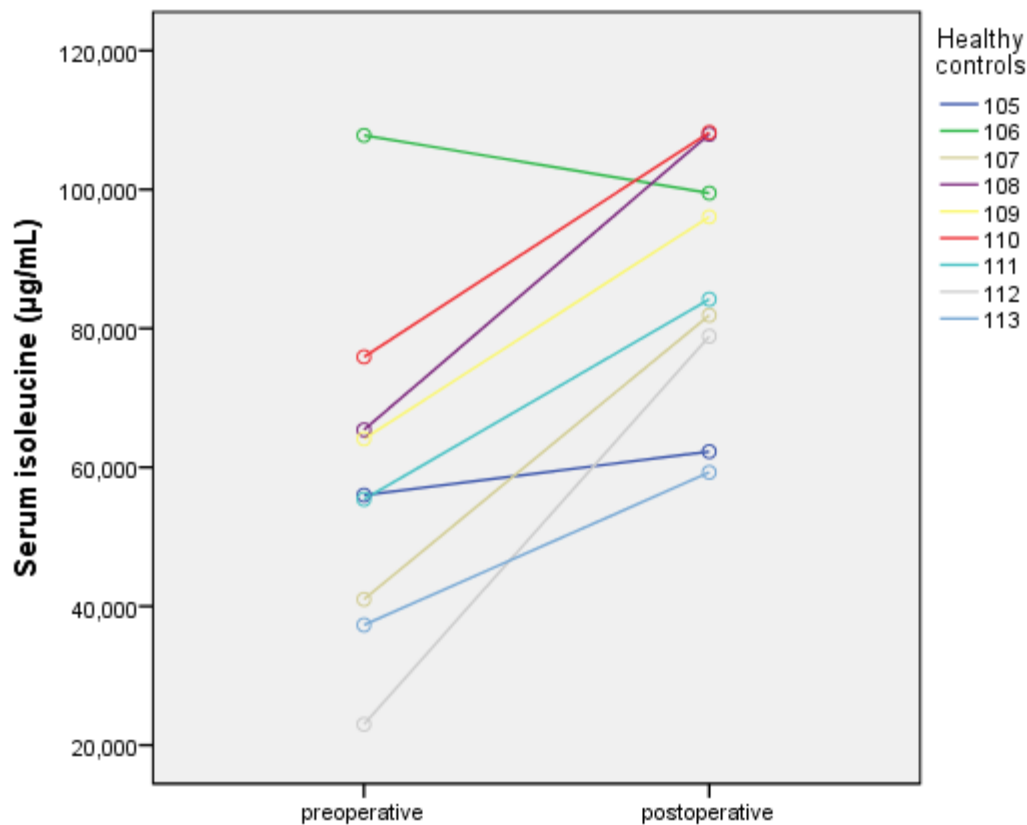**Lb**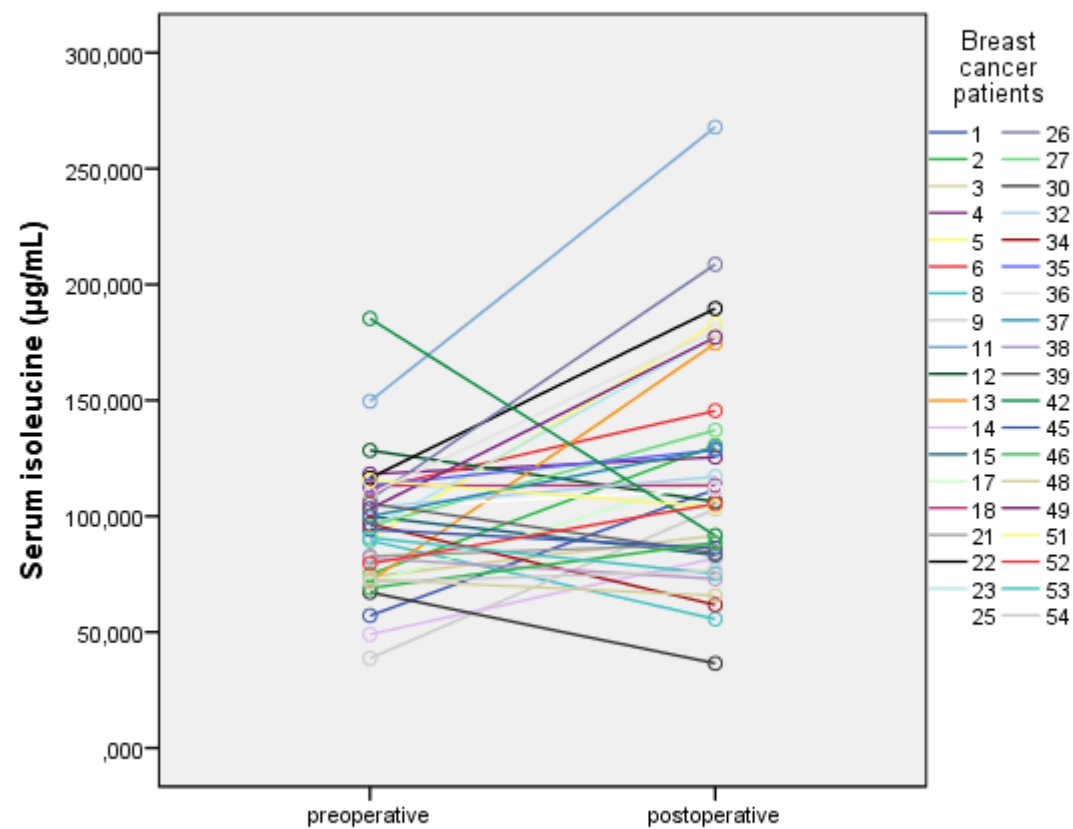

**Ma**

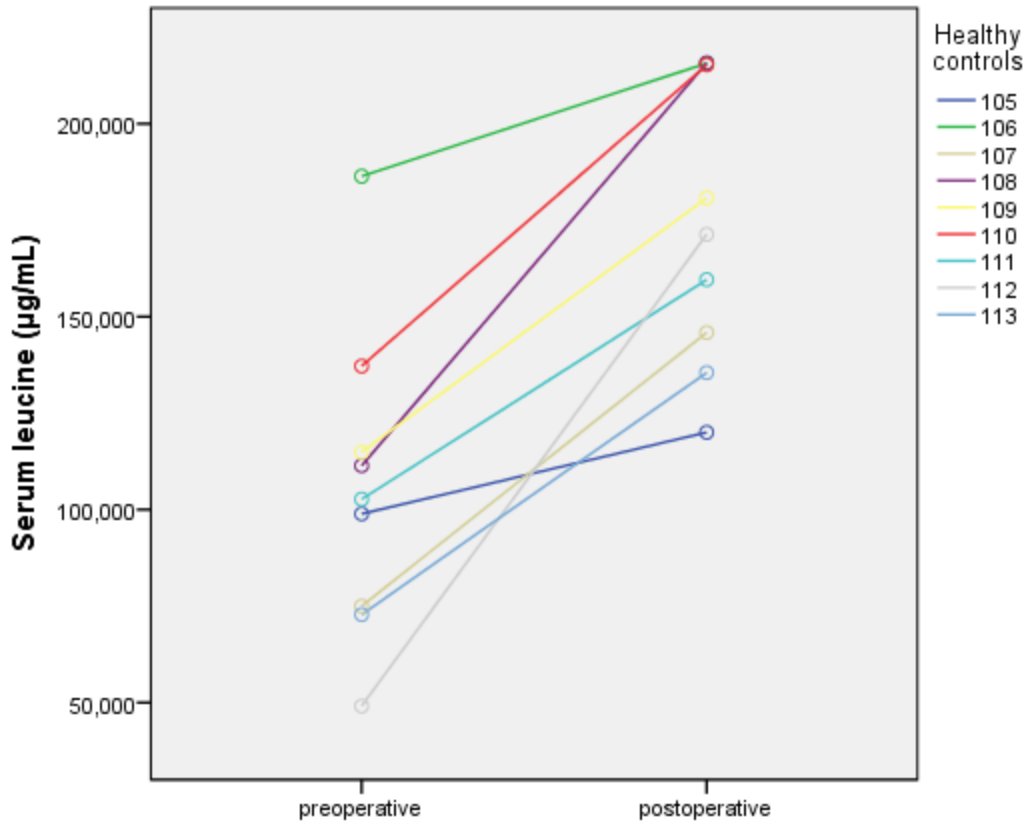

**Mb**

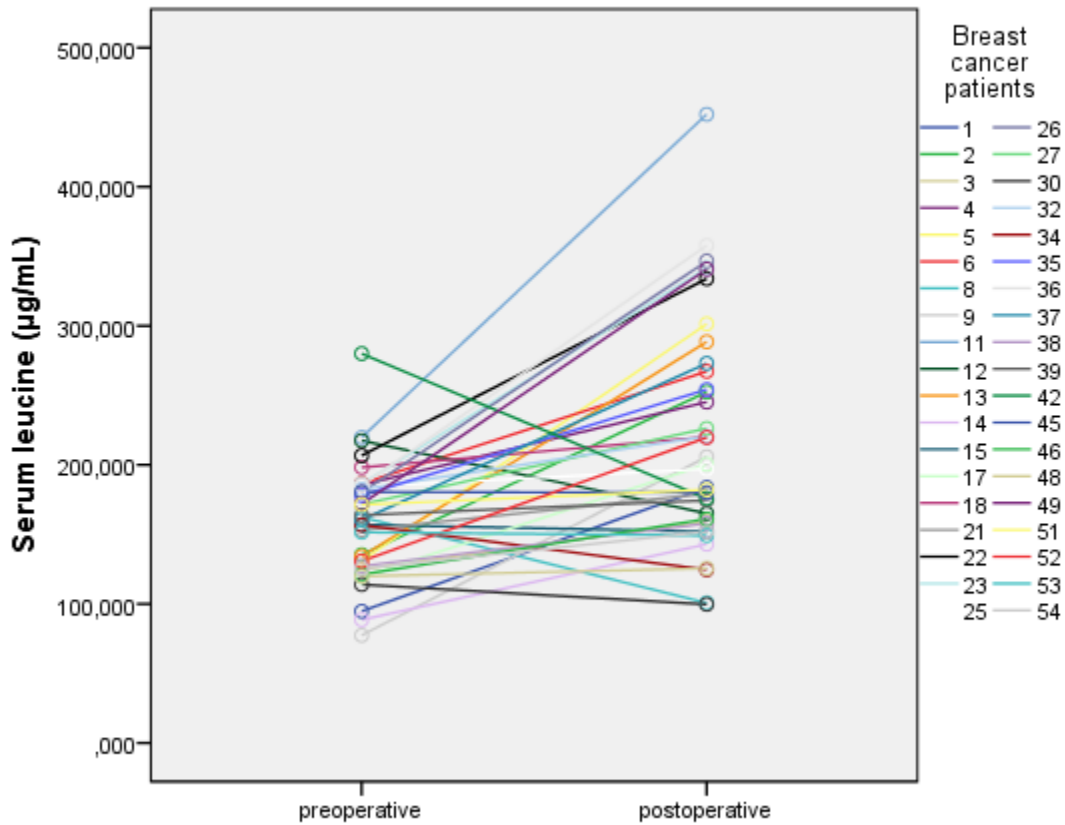

**Na**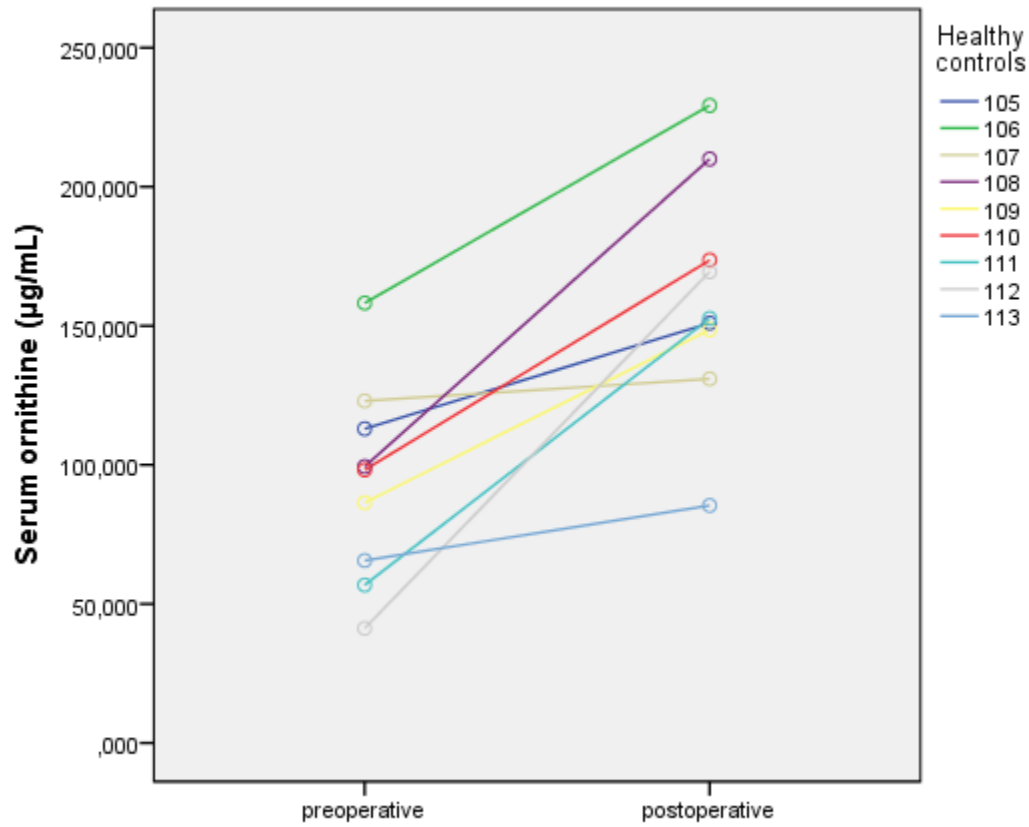**Nb**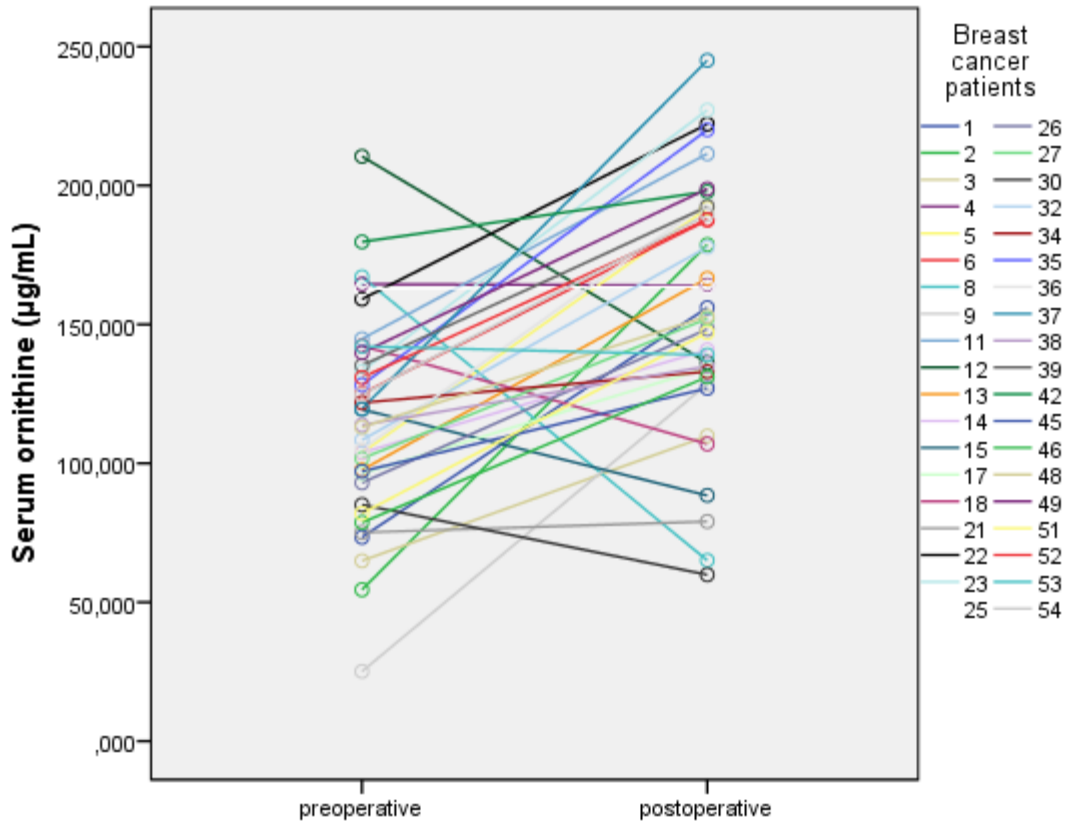

Oa

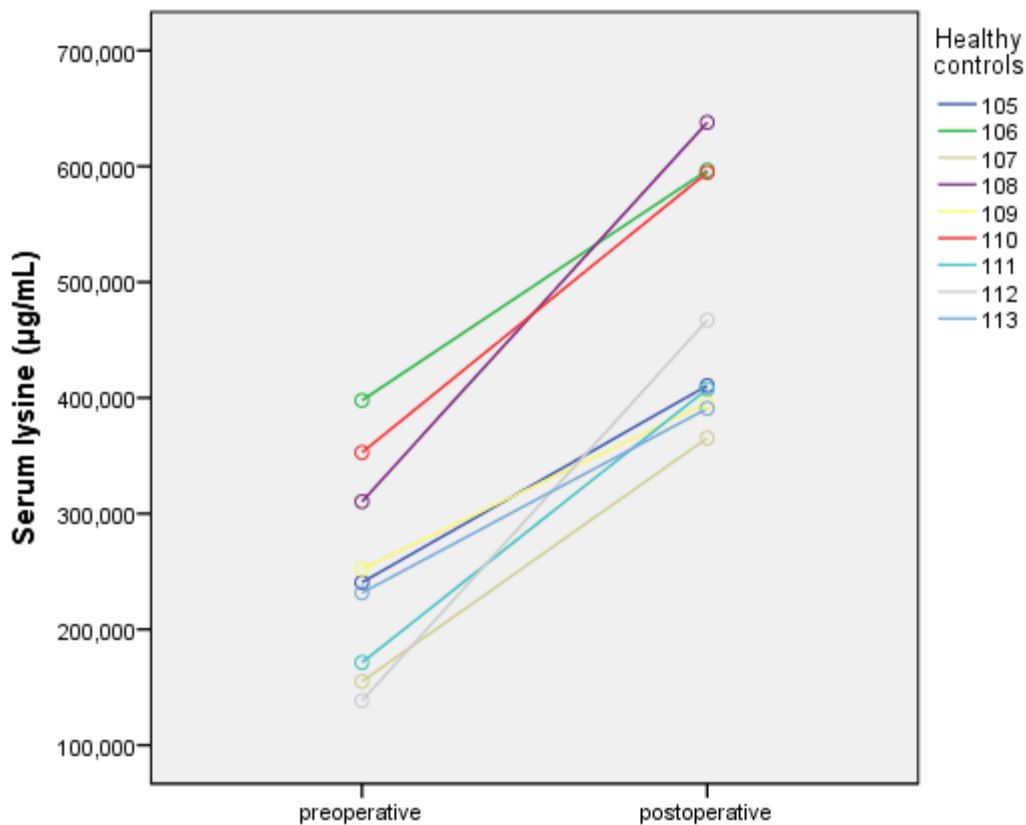

Ob

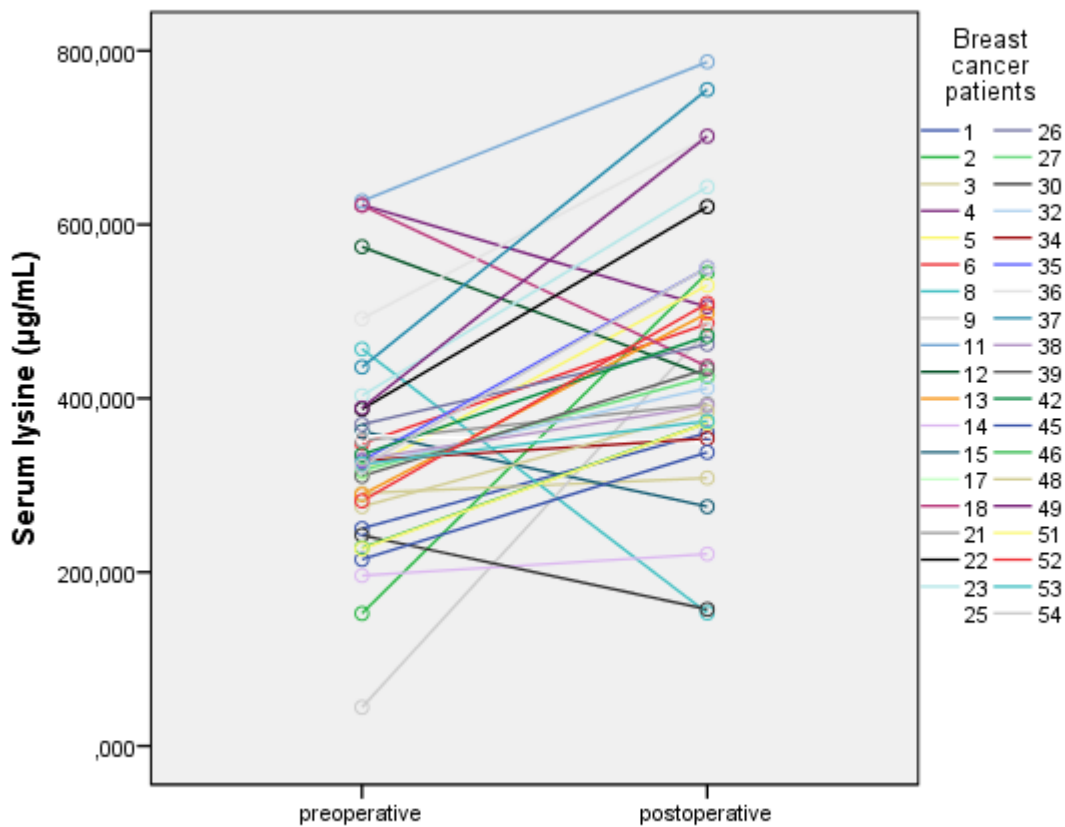

Supplement: 1479-5876-11-290-S2.pdf [file 1479-5876-11-290-S2.pdf]
